# Supplementary material for: A Prebiotic Diet Containing Galactooligosaccharides and Polydextrose <span aria-describedby="tippy-24">Produces Dynamic and Reproducible Changes in the Gut Microbial Ecosystem in Male Rats
Source: Preprints.org preprint supplement (doi:10.20944/preprints202405.0682.v1), 2024-05-10
Supplement: Supplementary file 1 [file supplementary]

RA\_g\_Gastranaerophilales

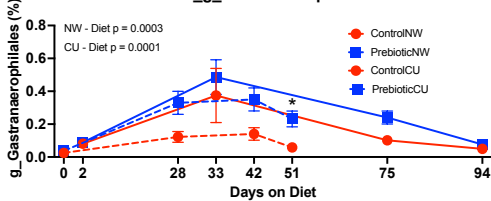

RA\_g\_NK4A214\_group

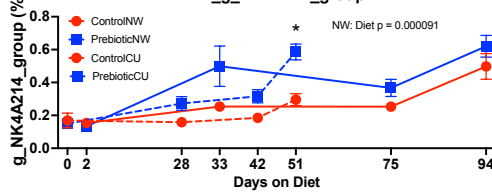

RA\_g\_Erysipelotclostridiaceae

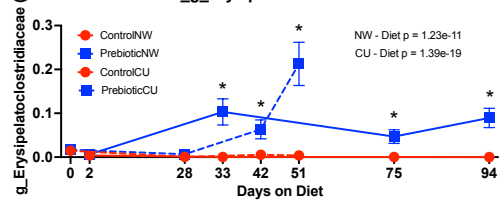

RA\_g\_Lachnospiraceae\_UCG-009

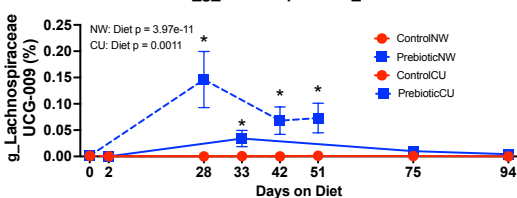

RA\_g\_Marvinbryantia

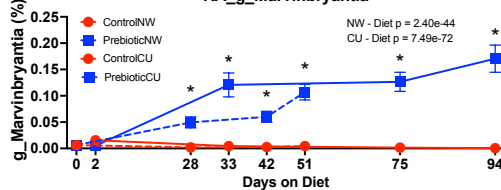

RA\_g\_Paludicola

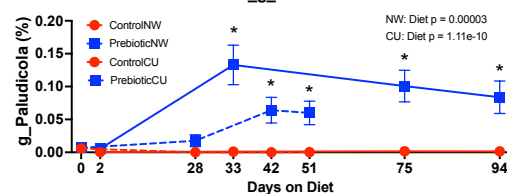

RA\_g\_UCG-010

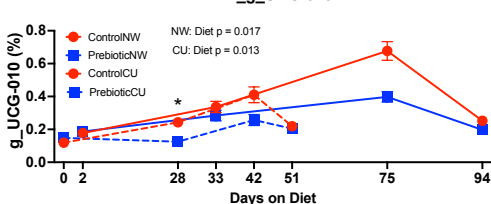

RA\_g\_Acetatifactor

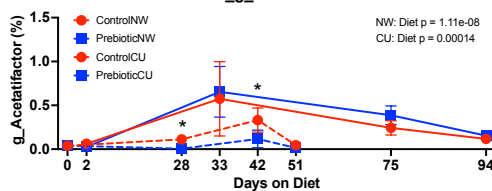

RA\_g\_ASF356

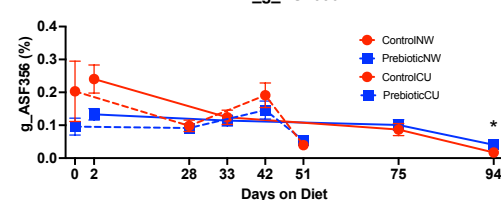

RA\_g\_Tuzzerella

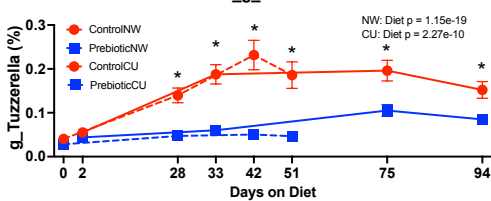

RA\_g\_UCG-009

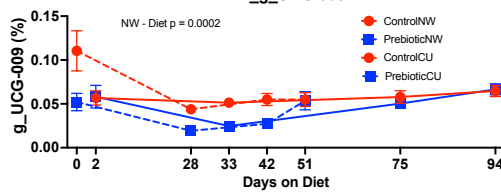

RA\_g\_Butyricicoccus

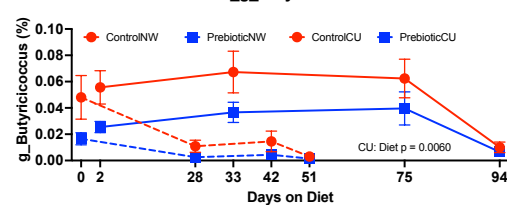

RA\_g\_[Clostridium]\_methylpentosum\_group

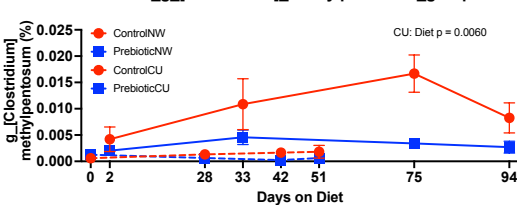

RA\_g\_Oscillibacter

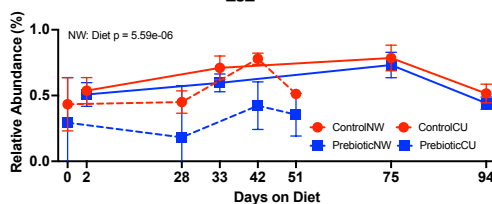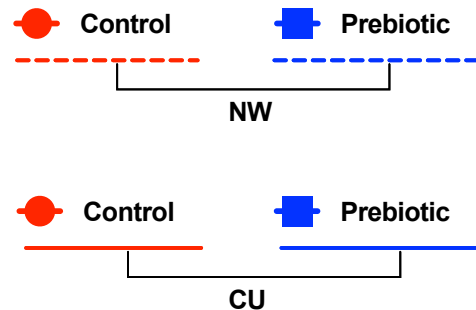

Nonparametric longitudinal data (nparLD) Table: ANOVA-type statistic (ATS)

Genera (relative abundances)

|                                                                                       |    | Diet - F-value; p-value |                     | Weeks - F-value; p-value    |                      | Diet x Time                |                     |
|---------------------------------------------------------------------------------------|----|-------------------------|---------------------|-----------------------------|----------------------|----------------------------|---------------------|
| <b>Higher in Prebiotic Diet - color indicates consistent effect across study site</b> |    |                         |                     |                             |                      |                            |                     |
| <b>Ultra Low Relative Abundance (&lt;1%)</b>                                          |    |                         |                     |                             |                      |                            |                     |
| Gastranaerophilales (Supp Fig 1)                                                      | NW | $F_{(1,2.70)} = 13.06$  | <b>p = 0.0003</b>   | $F_{(2.70,57.73)} = 25.86$  | <b>p = 2.70e-15</b>  | $F_{(2.70,57.73)} = 2.71$  | <b>p = 0.049</b>    |
|                                                                                       | CU | $F_{(1,2.75)} = 5.013$  | <b>p = 0.00010</b>  | $F_{(2.75,69.41)} = 27.58$  | <b>p = 1.53e-16</b>  | $F_{(2.75,69.41)} = 0.853$ | p = 0.456           |
| NK4A214_group (Supp Fig 1)                                                            | NW | $F_{(1,2.55)} = 15.31$  | <b>p = 0.000091</b> | $F_{(2.55,59.93)} = 30.74$  | <b>p = 2.76e-17</b>  | $F_{(2.55,59.93)} = 3.02$  | <b>p = 0.036</b>    |
|                                                                                       | CU | $F_{(1,2.81)} = 3.43$   | p = 0.0639          | $F_{(2.81,67.78)} = 124.83$ | <b>p = 7.018e-27</b> | $F_{(2.81,67.78)} = 1.14$  | p = 0.329           |
| Erysipelatoclostridiaceae (Supp Fig 1)                                                | NW | $F_{(1,2.37)} = 45.92$  | <b>p = 1.23e-11</b> | $F_{(2.37,55.35)} = 17.36$  | <b>p = 2.20e-09</b>  | $F_{(2.37,55.35)} = 32.68$ | <b>p = 3.20e-17</b> |
|                                                                                       | CU | $F_{(1,2.71)} = 81.95$  | <b>p = 1.39e-19</b> | $F_{(2.71,43.39)} = 5.58$   | <b>p = 0.0026</b>    | $F_{(2.71,43.39)} = 13.11$ | <b>p = 6.25e-08</b> |
| Lachnospiraceae_UCG-009 (Supp Fig 1)                                                  | NW | $F_{(1,2.44)} = 43.63$  | <b>p = 3.97e-11</b> | $F_{(2.44,33.98)} = 8.06$   | <b>p = 0.00009</b>   | $F_{(2.44,33.98)} = 12.15$ | <b>p = 7.17e-07</b> |
|                                                                                       | CU | $F_{(1,2.72)} = 10.60$  | <b>p = 0.0011</b>   | $F_{(2.72,41.14)} = 5.64$   | <b>p = 0.0011</b>    | $F_{(2.72,41.14)} = 4.02$  | <b>p = 0.009</b>    |
| Marvinbryantia (Supp Fig 1)                                                           | NW | $F_{(1,2.80)} = 195.14$ | <b>p = 2.40e-44</b> | $F_{(2.80,59.99)} = 12.20$  | <b>p = 1.37e-07</b>  | $F_{(2.80,59.99)} = 25.80$ | <b>p = 9.81e-16</b> |
|                                                                                       | CU | $F_{(1,2.38)} = 321.32$ | <b>p = 7.49e-72</b> | $F_{(2.38,68.96)} = 23.14$  | <b>p = 2.33e-12</b>  | $F_{(2.38,68.96)} = 49.31$ | <b>p = 8.28e-26</b> |
| Paludicola (Supp Fig 1)                                                               | NW | $F_{(1,2.03)} = 17.39$  | <b>p = 0.00003</b>  | $F_{(2.03,38.77)} = 5.20$   | <b>p = .00526</b>    | $F_{(2.03,38.77)} = 6.84$  | <b>p = 0.001</b>    |
|                                                                                       | CU | $F_{(1,2.77)} = 41.62$  | <b>p = 1.11e-10</b> | $F_{(2.77,42.42)} = 15.33$  | <b>p = 2.18e-09</b>  | $F_{(2.77,42.42)} = 7.99$  | <b>p = 0.000045</b> |

**Higher in Control Diet - color indicates consistent effect across study site**

|                                              |    | Diet - F-value; p-value |                     | Weeks - F-value; p-value    |                     | Diet x Time                |                     |
|----------------------------------------------|----|-------------------------|---------------------|-----------------------------|---------------------|----------------------------|---------------------|
| <b>Ultra Low Relative Abundance (&lt;1%)</b> |    |                         |                     |                             |                     |                            |                     |
| UCG-010 (Supp Fig 1)                         | NW | $F_{(1,2.94)} = 5.67$   | <b>p = 0.017</b>    | $F_{(2.94,59.52)} = 13.72$  | <b>p = 8.14e-09</b> | $F_{(2.94,59.52)} = 4.98$  | <b>p = 0.020</b>    |
|                                              | CU | $F_{(1,2.81)} = 6.17$   | <b>p = 0.013</b>    | $F_{(2.81,70.55)} = 45.90$  | <b>p = 5.71e-28</b> | $F_{(2.81,70.55)} = 1.75$  | p = 0.158           |
| Acetatifactor (Supp Fig 1)                   | NW | $F_{(1,2.91)} = 32.64$  | <b>p = 1.11e-08</b> | $F_{(2.91,59.04)} = 4.15$   | <b>p = 0.0065</b>   | $F_{(2.91,59.04)} = 7.67$  | <b>p = 0.000049</b> |
|                                              | CU | $F_{(1,2.94)} = 14.47$  | <b>p = 0.00014</b>  | $F_{(2.94,71.92)} = 9.48$   | <b>p = 3.54e-06</b> | $F_{(2.94,71.92)} = 0.71$  | p = 0.55            |
| ASF356 (Supp Fig 1)                          | NW | $F_{(1,2.88)} = 0.31$   | p = 0.577           | $F_{(2.88,59.31)} = 11.95$  | <b>p = 1.39e-07</b> | $F_{(2.88,59.31)} = 0.495$ | p = 0.677           |
|                                              | CU | $F_{(1,2.71)} = 0.926$  | p = 0.336           | $F_{(2.71,71.52)} = 37.74$  | <b>p = 2.86e-22</b> | $F_{(2.71,71.52)} = 3.07$  | <b>p = 0.031</b>    |
| Tuzzerella (Supp Fig 1)                      | NW | $F_{(1,2.87)} = 82.34$  | <b>p = 1.15e-19</b> | $F_{(2.87,57.95)} = 17.95$  | <b>p = 3.05e-11</b> | $F_{(2.87,57.95)} = 7.55$  | <b>p = 0.00006</b>  |
|                                              | CU | $F_{(1,2.68)} = 40.22$  | <b>p = 2.27e-10</b> | $F_{(2.68,71.35)} = 22.45$  | <b>p = 2.99e-13</b> | $F_{(2.68,71.35)} = 3.54$  | <b>p = 0.018</b>    |
| UCG-009 (Supp Fig 1)                         | NW | $F_{(1,2.79)} = 18.41$  | <b>p = 0.00002</b>  | $F_{(2.79,59.46)} = 4.34$   | <b>p = 0.0057</b>   | $F_{(2.79,59.46)} = 1.80$  | p = 0.150           |
|                                              | CU | $F_{(1,2.63)} = 3.73$   | p = 0.053           | $F_{(2.63,71.39)} = 7.66$   | <b>p = 9.92e-05</b> | $F_{(2.63,71.39)} = 2.45$  | p = 0.070           |
| Butyricococcus (Sup Fig 1)                   | NW | $F_{(1,2.42)} = 3.56$   | p = 0.059           | $F_{(2.42,58.33)} = 14.94$  | <b>p = 2.80e-08</b> | $F_{(2.42,58.33)} = 0.768$ | p = 0.486           |
|                                              | CU | $F_{(1,2.58)} = 3.95$   | <b>p = 0.047</b>    | $F_{(2.58,68.25)} = 129.02$ | <b>p = 8.77e-28</b> | $F_{(2.58,68.25)} = 1.88$  | p = 0.654           |
| Clostridium_methylpentosum_group (Sup Fig 1) | NW | $F_{(1,2.83)} = 2.50$   | p = 0.114           | $F_{(2.83,50.64)} = 0.206$  | p = 0.882           | $F_{(2.83,50.64)} = 1.01$  | p = 0.383           |
|                                              | CU | $F_{(1,2.72)} = 7.55$   | <b>p = 0.0060</b>   | $F_{(2.72,65.57)} = 5.00$   | <b>p = 0.0027</b>   | $F_{(2.72,65.57)} = 1.50$  | p = 0.215           |
| Oscillibacter (Supp Fig 1)                   | NW | $F_{(1,2.67)} = 20.63$  | <b>p = 5.59e-06</b> | $F_{(2.67,59.96)} = 5.38$   | <b>p = 0.0017</b>   | $F_{(2.67,59.96)} = 1.58$  | p = 0.197           |
|                                              | CU | $F_{(1,2.81)} = 0.520$  | p = 0.471           | $F_{(2.81,70.71)} = 7.55$   | <b>p = 0.000076</b> | $F_{(2.81,70.71)} = 0.12$  | p = 0.938           |

RA\_g\_Muribaculaceae

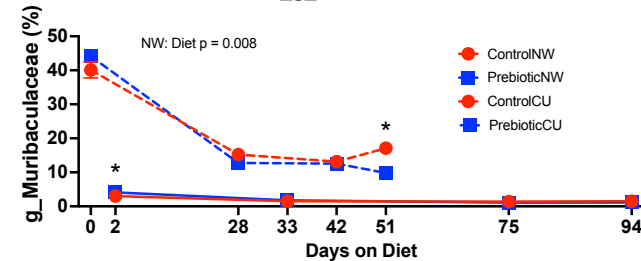

RA\_g\_Blautia

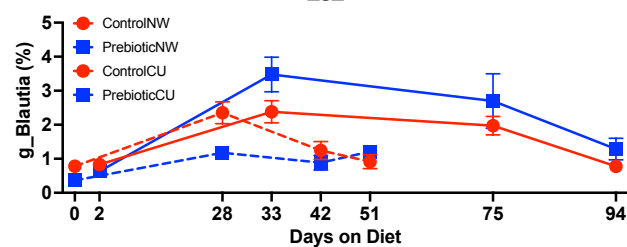

RA\_g\_RF39

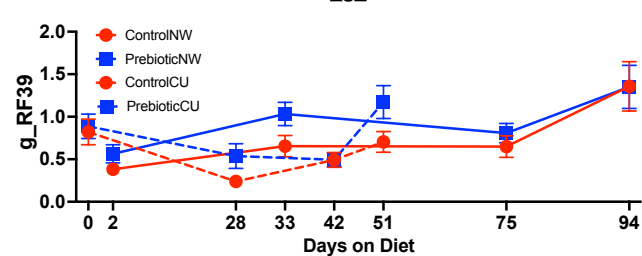

RA\_g\_Lachnoclostridium

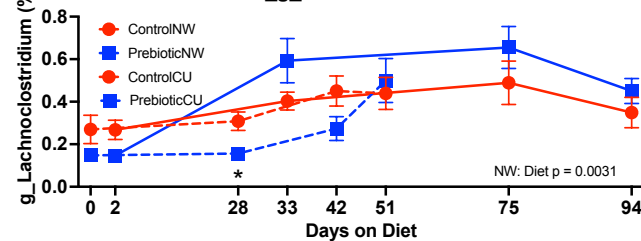

RA\_g\_A2

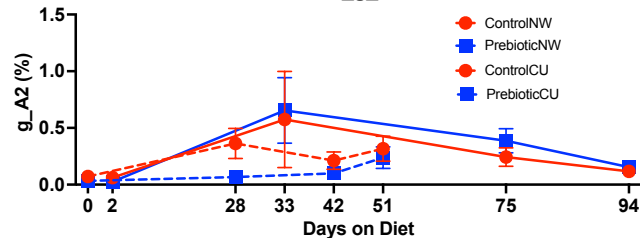

RA\_g\_Alistipes

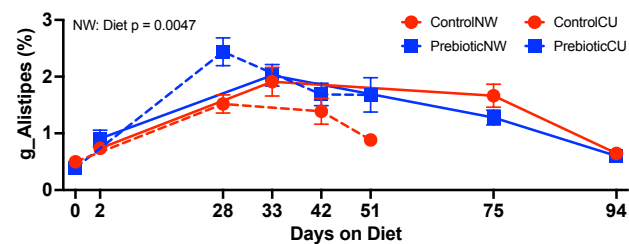

Nonparametric longitudinal data (nparLD) Table: ANOVA-type statistic (ATS)

| Genera (relative abundances)  | Diet - F-value; p-value |                        | Weeks - F-value; p-value |                             | Diet x Time          |                             |                     |
|-------------------------------|-------------------------|------------------------|--------------------------|-----------------------------|----------------------|-----------------------------|---------------------|
|                               | Inconsistent Effects    |                        |                          |                             |                      |                             |                     |
| Muribaculaceae (Sup Fig 2)    | NW                      | $F_{(1,2.74)} = 7.06$  | <b>p = 0.008</b>         | $F_{(2.74,51.30)} = 118.13$ | <b>p = 3.33e-70</b>  | $F_{(2.74,51.30)} = 9.90$   | <b>p = 0.000004</b> |
|                               | CU                      | $F_{(1,2.79)} = 0.004$ | p = 0.946                | $F_{(2.79,68.50)} = 92.744$ | <b>p = 4.74e-56</b>  | $F_{(2.79,68.50)} = 7.006$  | <b>p = 0.00016</b>  |
| Blautia (Sup Fig 2)           | NW                      | $F_{(1,2.94)} = 1.05$  | p = 0.305                | $F_{(2.94,51.13)} = 16.22$  | <b>p = 2.20e-10</b>  | $F_{(2.94,51.13)} = 5.22$   | <b>p = 0.0014</b>   |
|                               | CU                      | $F_{(1,2.52)} = 1.45$  | p = 0.239                | $F_{(2.52,71.81)} = 39.76$  | <b>p = 5.08e-22</b>  | $F_{(2.52,71.81)} = 1.89$   | p = 0.140           |
| RF39 (Sup Fig 2)              | NW                      | $F_{(1,2.68)} = 0.73$  | p = 0.39                 | $F_{(2.68,59.24)} = 19.52$  | <b>p = 1.48e-11</b>  | $F_{(2.68,59.24)} = 0.890$  | p = 0.436           |
|                               | CU                      | $F_{(1,2.82)} = 3.56$  | p = 0.059                | $F_{(2.82,71.85)} = 9.24$   | <b>p = 7.22e-06</b>  | $F_{(2.82,71.85)} = 0.919$  | p = 0.426           |
| Lachnoclostridium (Sup Fig 2) | NW                      | $F_{(1,2.92)} = 8.72$  | <b>p = 0.0031</b>        | $F_{(2.92,59.56)} = 10.40$  | <b>p = 1.04e-06</b>  | $F_{(2.92,59.56)} = 2.79$   | <b>p = 0.040</b>    |
|                               | CU                      | $F_{(1,2.85)} = 1.94$  | p = 0.164                | $F_{(2.85,79.69)} = 21.00$  | <b>p = 4.80e-13</b>  | $F_{(2.85,79.69)} = 7.68$   | <b>p = 0.000057</b> |
| A2 (Sup Fig 2)                | NW                      | $F_{(1,2.92)} = 3.53$  | p = 0.060                | $F_{(2.92,59.76)} = 4.69$   | <b>p = 0.0031</b>    | $F_{(2.92,59.76)} = 0.622$  | p = 0.596           |
|                               | CU                      | $F_{(1,2.88)} = 2.79$  | p = 0.095                | $F_{(2.88,69.91)} = 14.68$  | <b>p = 2.883e-09</b> | $F_{(2.88,69.91)} = 2.15$   | p = 0.095           |
| Alistipes (Sup Fig 2)         | NW                      | $F_{(1,2.82)} = 7.99$  | <b>p = 0.0047</b>        | $F_{(2.82,58.41)} = 41.33$  | <b>p = 8.21e-30</b>  | $F_{(2.82,58.41)} = 2.04$   | p = 0.190           |
|                               | CU                      | $F_{(1,2.77)} = 0.322$ | p = 0.57                 | $F_{(2.77,71.937)} = 42.86$ | <b>p = 9.04e-26</b>  | $F_{(2.77,71.937)} = 1.267$ | p = 0.284           |
